# Supplementary material for: Antibacterial and Antifungal Properties of Composite Polyethylene Materials Reinforced with Neem and Turmeric
Source: Preprints.org preprint supplement (doi:10.20944/preprints202011.0149.v1), 2020-11-03
Supplement: Supplementary file 1 [file Supplementary captions.docx]

Figure S1: Molecular structure of the bioactive compounds of (a) turmeric, in both diketone and keto-enol form and (b) neem, quercetin and sitosterol

Figure S2: Centrifuged pellet of E. coli bacteria exposed to 5% turmeric polyethylene composite showing the presence of curcumin inside the cell membranes.
